# Supplementary material
Source: publisher site journal article supplement (https://www.dovepress.com/article/477791)
Supplement: Supplementary file 1 [file get_supplementary_file.php]

| Database | Term | Keyword | Retrieved |
| --- | --- | --- | --- |
| Pubmed | #1 | Superparamagnetic Iron Oxide Nanoparticles OR Superparamagnetic Iron Nanoparticles OR Iron Nanoparticle Superparamagnetic OR Nanoparticle Superparamagnetic Iron OR Nanoparticles Superparamagnetic Iron OR Superparamagnetic Iron Nanoparticle OR SPIONs | 16,912 |
|  | #2 | Treatment OR Therapeutic OR Therapy OR Therapies OR Treatments | 14,114,610 |
|  | #3 | Mouth Neoplasm OR Mouth Neoplasms OR Oral Cancer OR Oral Cancers OR Mouth Cancers OR Mouth Cancer OR Cancer of the Mouth OR Cancer of Mouth | 179,509 |
|  | Query | (Superparamagnetic Iron Oxide Nanoparticles OR Superparamagnetic Iron Nanoparticles OR Iron Nanoparticle Superparamagnetic OR Nanoparticle Superparamagnetic Iron OR Nanoparticles Superparamagnetic Iron OR Superparamagnetic Iron Nanoparticle OR SPIONs) AND (Treatment OR Therapeutic OR Therapy OR Therapies OR Treatment) AND (Mouth Neoplasm OR Mouth Neoplasms OR Oral Cancer OR Oral Cancers OR Mouth Cancers OR Mouth Cancer OR Cancer of the Mouth OR Cancer of Mouth) | 63 |
| Scopus | #1 | Superparamagnetic Iron Oxide Nanoparticles OR Superparamagnetic Iron Nanoparticles OR Iron Nanoparticle Superparamagnetic OR Nanoparticle Superparamagnetic Iron OR Nanoparticles Superparamagnetic Iron OR Superparamagnetic Iron Nanoparticle OR SPIONs | 13,642 |
|  | #2 | Treatment OR Therapeutic OR Therapy OR Therapies OR Treatments | 13,550,293 |
|  | #3 | Mouth Neoplasm OR Mouth Neoplasms OR Oral Cancer OR Oral Cancers OR Mouth Cancers OR Mouth Cancer OR Cancer of the Mouth OR Cancer of Mouth | 59,140 |
|  | query | "Superparamagnetic Iron Oxide Nanoparticles" OR "Superparamagnetic Iron Nanoparticles" OR "Iron Nanoparticle Superparamagnetic" OR "Nanoparticle Superparamagnetic Iron" OR "Nanoparticles Superparamagnetic Iron" OR "Superparamagnetic Iron Nanoparticle" AND "Treatment" OR "Therapeutic" OR "Therapy" OR "Therapies" OR "Treatments" AND "Mouth Neoplasm" OR "Mouth Neoplasms" OR "Oral Cancer" OR "Oral Cancers" OR "Mouth Cancers" OR "Mouth Cancer" OR "cancer off the mouth" OR "cancer off mouth" | 9 |
| Ebsco | #1 | Superparamagnetic Iron Oxide Nanoparticles OR Superparamagnetic Iron Nanoparticles OR Iron Nanoparticle Superparamagnetic OR Nanoparticle Superparamagnetic Iron OR Nanoparticles Superparamagnetic Iron OR Superparamagnetic Iron Nanoparticle OR SPIONs | 3,818 |
|  | #2 | Treatment OR Therapeutic OR Therapy OR Therapies OR Treatments | 10,836,116 |
|  | #3 | Mouth Neoplasm OR Mouth Neoplasms OR Oral Cancer OR Oral Cancers OR Mouth Cancers OR Mouth Cancer OR Cancer of the Mouth OR Cancer of Mouth | 61,273 |
|  | query | (Superparamagnetic Iron Oxide Nanoparticles OR Superparamagnetic Iron Nanoparticles OR Iron Nanoparticle Superparamagnetic OR Nanoparticle Superparamagnetic Iron OR Nanoparticles Superparamagnetic Iron OR Superparamagnetic Iron Nanoparticle OR SPIONs) AND (Treatment OR Therapeutic OR Therapy OR Therapies OR Treatment) AND (Mouth Neoplasm OR Mouth Neoplasms OR Oral Cancer OR Oral Cancers OR Mouth Cancers OR Mouth Cancer OR Cancer of the Mouth OR Cancer of Mouth) | 5 |
